# Supplementary material for: Three-dimensional NiCo2O4@NiWO4 core–shell nanowire arrays for high performance supercapacitors
Source: Royal Society of Chemistry journal article supplement (doi:10.1039/c6ta08578d), 2016-11-21
Supplement: c6ta08578d1.pdf [file c6ta08578d1.pdf]

## Supplementary Information

### Three-dimensional NiCo<sub>2</sub>O<sub>4</sub>@NiWO<sub>4</sub> core-shell nanowire arrays for high performance supercapacitor

Sanming Chen<sup>a</sup>, Guang Yang<sup>a</sup>, Yi Jia<sup>b</sup>, Huajun Zheng<sup>a,c,\*</sup>

<sup>a</sup> Department of Applied Chemistry, Zhejiang University of Technology, Hangzhou 310014, China

<sup>b</sup> Queensland Micro and Nanotechnology Centre, Griffith University, Nathan, QLD, Australia

<sup>c</sup> State Key Laboratory Breeding Base of Green Chemistry Synthesis Technology, Zhejiang  
University of Technology, Hangzhou 310014, China

\* E-mail: zhenghj@zjut.edu.cn

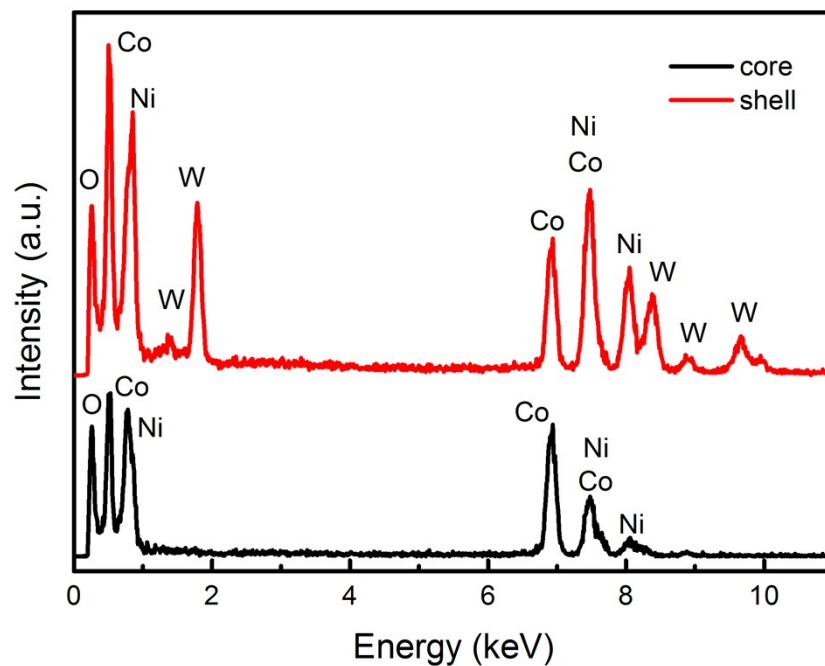

**Fig. S1** EDS analysis of NiCo<sub>2</sub>O<sub>4</sub>@NiWO<sub>4</sub> hybrid nanowires (8h).

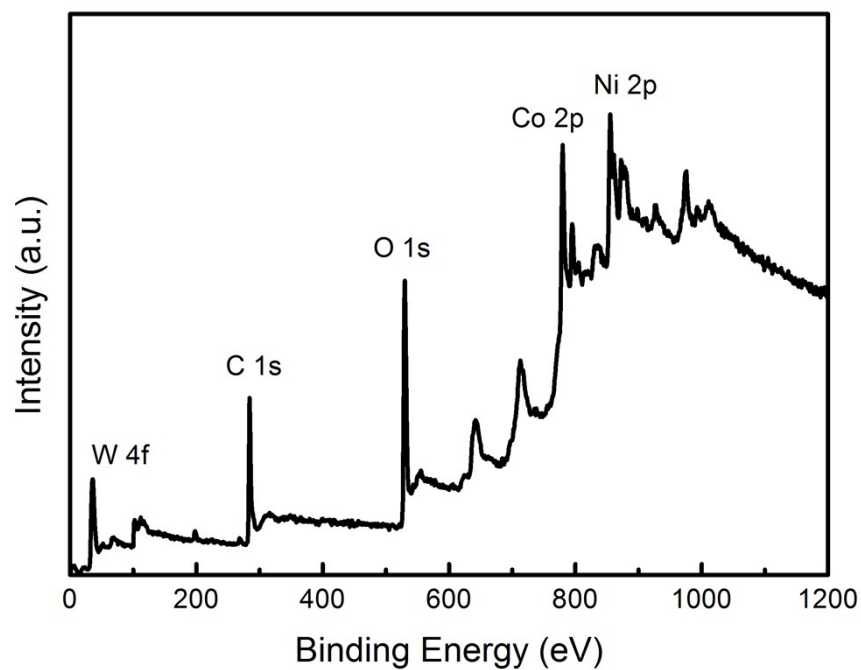

**Fig. S2** Wide-scan XPS spectra of NiCo<sub>2</sub>O<sub>4</sub>@NiWO<sub>4</sub> hybrid nanowires (8h).

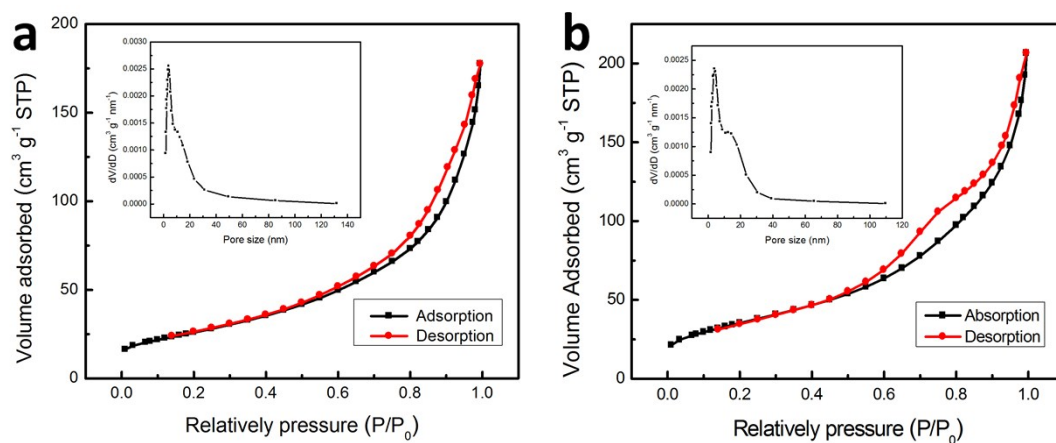

**Fig. S3** N<sub>2</sub> adsorption-desorption isotherms of (a) NiCo<sub>2</sub>O<sub>4</sub> nanowires and (b) NiCo<sub>2</sub>O<sub>4</sub>@NiWO<sub>4</sub> hybrid nanowires (the inset shows the pore size distribution).

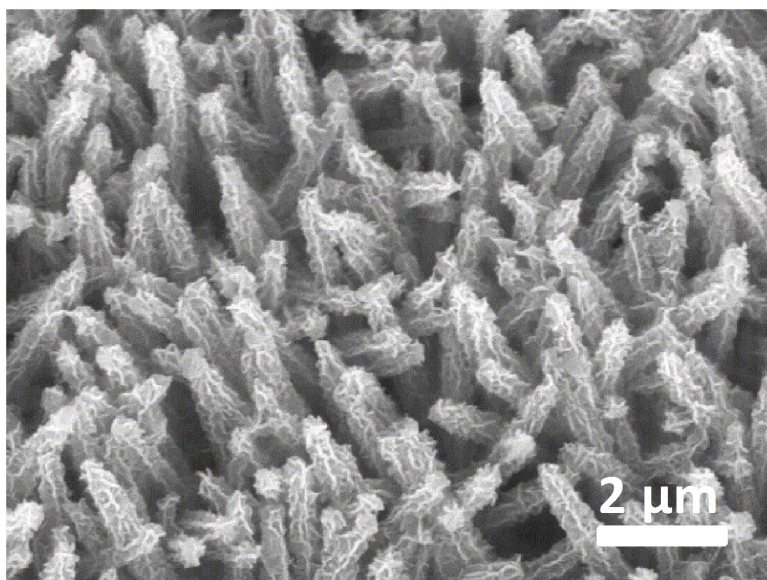

**Fig. S4** SEM image of NiCo<sub>2</sub>O<sub>4</sub>@NiWO<sub>4</sub> electrode (8h) after charge-discharge for 6000 cycles.

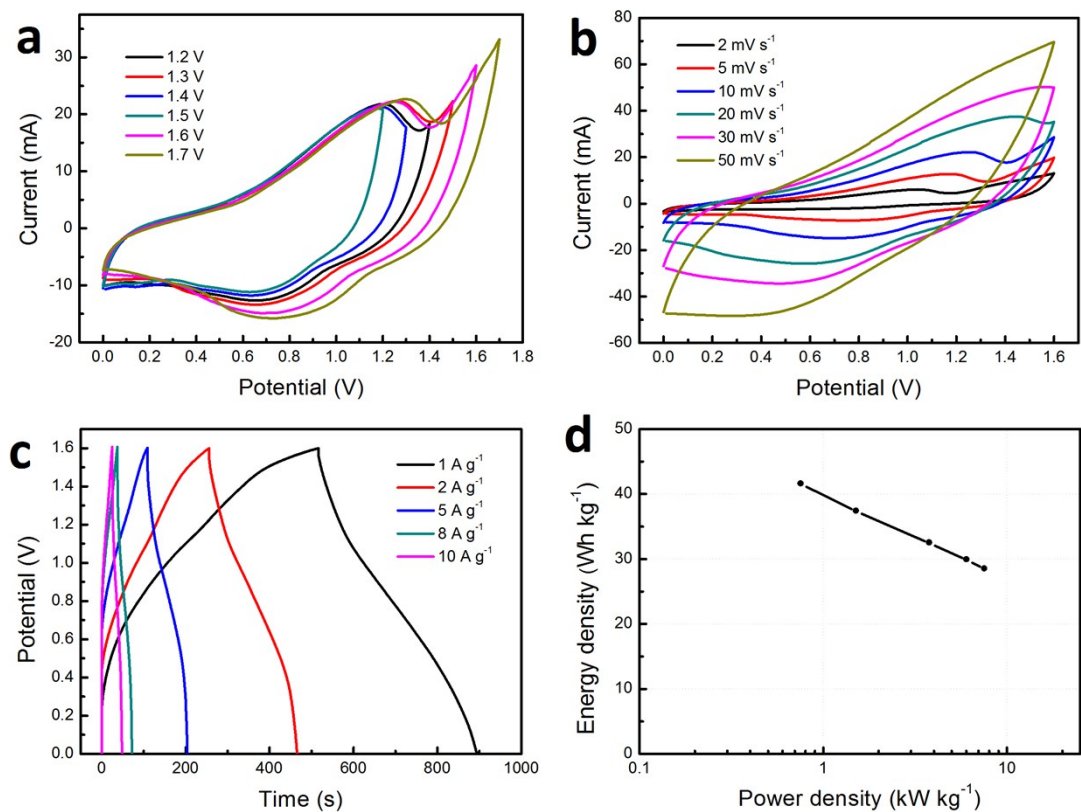

**Fig. S5** (a) CV curves of the NiCo<sub>2</sub>O<sub>4</sub>@NiWO<sub>4</sub> hybrid electrode (8 h)//AC ASC device collected at various potential windows from 1.2 to 1.7 V; (b) CV curves of the ASC device at different scan rates from 2 to 50 mV s<sup>-1</sup>; (c) GCD curves of the ASC device at various current densities from 1 to 10 A g<sup>-1</sup>; (d) Ragone plot of the as-fabricated ASC device.

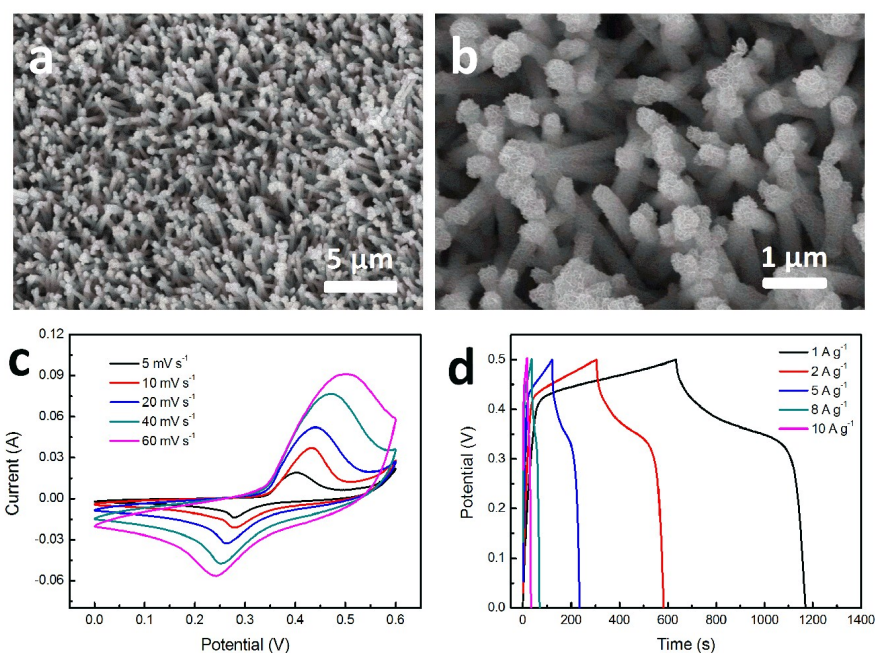

**Fig. S6** (a, b) SEM image of the NiCo<sub>2</sub>O<sub>4</sub>@NiO hybrid nanowires; (c) CV curves of NiCo<sub>2</sub>O<sub>4</sub>@NiO hybrid electrode at different scan rates from 5 to 60 mV s<sup>-1</sup>; (d) GCD curves of NiCo<sub>2</sub>O<sub>4</sub>@NiO hybrid electrode at various current densities from 1 to 10 A g<sup>-1</sup>.

NiCo<sub>2</sub>O<sub>4</sub>@NiO hybrid nanowires are prepared for comparison with NiCo<sub>2</sub>O<sub>4</sub>@NiWO<sub>4</sub> hybrid nanowires. The morphology and electrochemical performance of NiCo<sub>2</sub>O<sub>4</sub>@NiO hybrid nanowires are shown in Fig. S5. It can be seen that NiCo<sub>2</sub>O<sub>4</sub> nanowires are decorated with NiO nanosheets, forming highly porous core-shell heterostructures. The NiO nanosheets are interconnected with each other and there are abundant space between neighboring nanowires. A pair of redox peaks can be clearly observed in each CV curve (Fig.S5c), indicating that the capacitance is mainly based on the Faradaic redox mechanism. The NiCo<sub>2</sub>O<sub>4</sub>@NiO hybrid electrode delivers a specific capacitance of 1220.8, 1147.1, 1067, 1011.7 and 981.5 F g<sup>-1</sup> at a current density of 1, 2, 5, 8 and 10 A g<sup>-1</sup>, respectively. The capacitance retention is 80.4% when the current density is increased from 1 A g<sup>-1</sup> to 10 A g<sup>-1</sup>. Therefore, NiCo<sub>2</sub>O<sub>4</sub>@NiWO<sub>4</sub> hybrid electrode exhibits superior supercapacitive performance than NiCo<sub>2</sub>O<sub>4</sub>@NiO hybrid electrode.

**Table S1** The electrochemical properties of the NiCo<sub>2</sub>O<sub>4</sub>@NiWO<sub>4</sub> hybrid electrode (8 h) compared with other references.

| Types of materials                                                                                     | Areal (specific) capacitance                    | Rate capability                                  | Cycling stability                                          | Ref.      |
|--------------------------------------------------------------------------------------------------------|-------------------------------------------------|--------------------------------------------------|------------------------------------------------------------|-----------|
| NiCo <sub>2</sub> O <sub>4</sub> @NiCo <sub>2</sub> O <sub>4</sub> core/shell nanoflake arrays         | 1.55 F/cm <sup>2</sup> at 2 mA/cm <sup>2</sup>  | 74.8% retention from 2 to 40 mA/cm <sup>2</sup>  | 98.6% retention after 4000 cycles at 5 mA/cm <sup>2</sup>  | 1         |
| NiCo <sub>2</sub> O <sub>4</sub> @MnO <sub>2</sub> nanowire arrays                                     | 3.31 F/cm <sup>2</sup> at 2 mA/cm <sup>2</sup>  | 50.2% retention from 2 to 20 mA/cm <sup>2</sup>  | 88% retention after 2000 cycles at 10 mA/cm <sup>2</sup>   | 2         |
| NiCo <sub>2</sub> O <sub>4</sub> @TiN core/shell nanowires                                             | 998 mF/cm <sup>2</sup> at 2 mA/cm <sup>2</sup>  | 58.3% retention from 2 to 20 mA/cm <sup>2</sup>  | 72.2% retention after 2000 cycles at 10 mA/cm <sup>2</sup> | 3         |
| NiCo <sub>2</sub> O <sub>4</sub> @NiMoO <sub>4</sub> nanowire/nanosheet arrays                         | 5.80 F/cm <sup>2</sup> at 10 mA/cm <sup>2</sup> | 83.6% retention from 10 to 80 mA/cm <sup>2</sup> | 81.8% retention after 5000 cycles at 50 mA/cm <sup>2</sup> | 4         |
| MnMoO <sub>4</sub> /CoMoO <sub>4</sub> heterostructured nanowires                                      | 204.1 F/g at 0.5 A/g                            | 66% retention from 0.5 to 3 A/g                  | 98% retention after 1000 cycles at 20 A/g                  | 5         |
| NiCo <sub>2</sub> O <sub>4</sub> @MnMoO <sub>4</sub> core/shell Nanoflowers                            | 1118 F/g at 1 A/g                               | 66.7% retention from 1 to 10 mA/cm <sup>2</sup>  | 87.85% retention after 5000 cycles at 1 A/g                | 6         |
| NiCo <sub>2</sub> O <sub>4</sub> @Ni <sub>3</sub> S <sub>2</sub> nanothorn arrays                      | 1716 F/g at 1A/g                                | 64.3% retention from 1 to 20 A/g                 | 83.7% retention after 2000 cycles at 4 A/g                 | 7         |
| NiCo <sub>2</sub> O <sub>4</sub> @MnMoO <sub>4</sub> Nanocolumn Arrays                                 | 1705.3 F/g at 5 mA/cm <sup>2</sup>              | 62.3% retention from 1 to 20 mA/cm <sup>2</sup>  | 92.6% retention after 5000 cycles                          | 8         |
| NiCo <sub>2</sub> O <sub>4</sub> @CoMoO <sub>4</sub> nanowire/nanoplate arrays                         | 1280.2 F/g at 10 mA/cm <sup>2</sup>             | 65.8% retention from 10 to 60 mA/cm <sup>2</sup> | 74.1% retention after 1000 cycles at 60 mA/cm <sup>2</sup> | 9         |
| NiCo <sub>2</sub> O <sub>4</sub> @Co <sub>x</sub> Ni <sub>1-x</sub> (OH) <sub>2</sub> nanosheet arrays | 987.3 F/g at 5 A/g                              | 83.7% retention from 1 to 50 A/g                 | 88.3% retention after 3000 cycles                          | 10        |
| ZnCo <sub>2</sub> O <sub>4</sub> @NiCo <sub>2</sub> O <sub>4</sub> core/sheath nanowires               | 1476 F/g at 1 A/g                               | 63.8% retention from 1 to 20 A/g                 | 98.9% retention after 2000 cycles at 10 A/g.               | 11        |
| NiCo <sub>2</sub> O <sub>4</sub> @NiWO <sub>4</sub> core/shell Nanowires                               | 1384 F/g at 1 A/g                               | 85.5% retention from 1 to 10 A/g                 | 87.6% retention after 6000 cycles at 5 A/g                 | This work |

## References

- 1 X. Y. Liu, S. J. Shi, Q. Q. Xiong, L. Li, Y. J. Zhang, H. Tang, C. D. Gu, X. L. Wang and J. P. Tu, *ACS Appl. Mater. Interfaces*, 2013, **5**, 8790-8795.
- 2 L. Yu, G. Q. Zhang, C. Z. Yuan and X. W. Lou, *Chem. Commun.*, 2013, **49**, 137-139.
- 3 R. Q. Wang, C. Xia, N. N. Wei and H. N. Alshareef, *Electrochim. Acta*, 2016, **196**, 611-621.
- 4 D. Cheng, Y. F. Yang, J. L. Xie, C. J. Fang, G. Q. Zhang and J. Xiong, *J. Mater. Chem. A*, 2015, **3**, 14348-14357.
- 5 L. Q. Mai, F. Yang, Y. L. Zhao, X. Xu, L. Xu and Y. Z. Luo, *Nat. Commun.*, 2011, **2**, 503-507.
- 6 Z. X. Gu and X. J. Zhang, *J. Mater. Chem. A*, 2016, **4**, 8249-8254
- 7 J. P. Wang, S. L. Wang, Z. C. Huang and Y. M. Yu, *J. Mater. Chem. A*, 2014, **2**, 17595-17601.
- 8 C. Y. Cui, J. T. Xu, L. Wang, D. Guo, M. L. Mao, J. M. Ma and T. H. Wang, *ACS Appl. Mater. Interfaces*, 2016, **8**, 8568-8575.
- 9 D. P. Cai, B. Liu, D. D. Wang, L. L. Wang, Y. Liu, H. Li, Y. R. Wang, Q. H. Li and T. H. Wang, *J. Mater. Chem. A*, 2014, **2**, 4954-4960.
- 10 K. B. Xu, R. J. Zou, W. Y. Li, Q. Liu, X. J. Liu, L. Ana and J. Q. Hu, *J. Mater. Chem. A*, 2014, **2**, 10090-10097.
- 11 Y. P. Huang, Y. E. Miao, H. Y. Lu and T. X. Liu, *Chem. Eur. J.*, 2015, **21**, 10100-10108.
